# Supplementary material
Source: Springer Nature journal article supplement (https://www.springermedizin.de/resource/supplementary/40169_2014_79_MOESM2_ESM.pdf/9675492)
Supplement: MOESM2 [file 9675492]

# A Influence of SOX2 on Cellular Processes

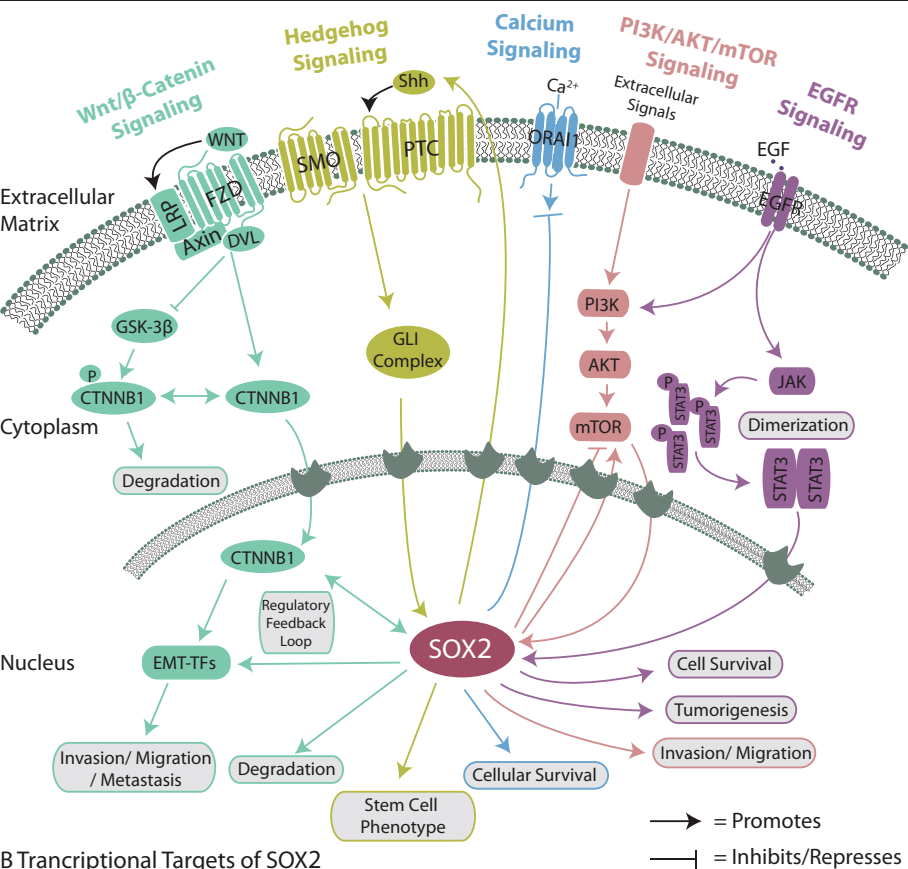

## B Transcriptional Targets of SOX2

| Cellular Function                      | Transcriptional Targets | Cancer Type     | Contradictory Research                 |
|----------------------------------------|-------------------------|-----------------|----------------------------------------|
| Promotes cell proliferation            | SOX2 → p27              | Pancreatic [26] | Colorectal [35-36]<br>Gastric [28, 37] |
|                                        | SOX2 → p21              | Pancreatic [26] |                                        |
|                                        | SOX2 → CCND3            | Pancreatic [26] |                                        |
|                                        | SOX2 → CCND1            | Breast [60]     |                                        |
|                                        | SOX2 ✗ BMP4             | LSCC [34]       |                                        |
| Represses apoptosis                    | SOX2 ✗ ORAI1            | Prostate [25]   |                                        |
| Promotes invasion/migration/metastasis | SOX2 → SNAIL            | Pancreatic [26] | Breast [61]                            |
|                                        | SOX2 → SLUG             | Pancreatic [26] |                                        |
|                                        | SOX2 → TWIST            | Pancreatic [26] |                                        |
| Maintains stem cell phenotype          | SOX2 → HHAT             | LSCC [21]       |                                        |
